# Supplementary material for: MPox virus: an unusual aetiology of peritonitis
Source: HighWire-hosted journal article supplement (doi:10.1136/sextrans-2022-055704), 2023-03-16
Supplement: sextrans-2022-055704supp001_data_supplement.pdf [file sextrans-2022-055704supp001_data_supplement.pdf]

Nous décrivons un cas rare de péritonite à monkeypox (MPox) chez un homme de 44 ans, vivant avec une infection à VIH contrôlée. Le patient a bien évolué sous traitement par técovirimat sans nécessiter de chirurgie. Le MPox doit être considérée comme une étiologie possible de péritonite non bactérienne chez les patients à risque.
